# Supplementary material for: Optimal Short-Time Acquisition Schemes in High Angular Resolution Diffusion-Weighted Imaging
Source: PubMed Central journal article supplement (PMC3608261; doi:10.1155/2013/658583), 2013-03-11
Supplement: 658583.f1.pdf [file 658583.f1.pdf]

## Tables for optimal $b$ -value selection

| $b$ -value ( $s/mm^2$ ) | Signal to Noise Ratio (SNR) |                  |                 |                  |                  |                  |                  |                  |
|-------------------------|-----------------------------|------------------|-----------------|------------------|------------------|------------------|------------------|------------------|
|                         | $\infty$                    | 50.0             | 25.0            | 16.7             | 12.5             | 10.0             | 8.3              | 5.0              |
| <b>1000</b>             | $\bar{x}$ : 60.0            | $\bar{x}$ : 11.0 | $\bar{x}$ : 9.3 | $\bar{x}$ : 14.1 | $\bar{x}$ : 16.9 | $\bar{x}$ : 18.0 | $\bar{x}$ : 19.4 | $\bar{x}$ : 24.8 |
|                         | $s$ 0.0:                    | $s$ 2.5:         | $s$ 4.7:        | $s$ 9.8:         | $s$ 10.1:        | $s$ 10.4:        | $s$ 9.6:         | $s$ 9.9:         |
|                         | $p$ : 0.00                  | $p$ : 0.46       | $p$ : 0.44      | $p$ : 0.62       | $p$ : 0.82       | $p$ : 0.93       | $p$ : 0.91       | $p$ : 0.99       |
| <b>1500</b>             | $\bar{x}$ : 5.7             | $\bar{x}$ : 6.3  | $\bar{x}$ : 6.4 | $\bar{x}$ : 10.0 | $\bar{x}$ : 12.3 | $\bar{x}$ : 12.8 | $\bar{x}$ : 16.0 | $\bar{x}$ : 27.2 |
|                         | $s$ 0.0:                    | $s$ 1.9:         | $s$ 2.8:        | $s$ 9.3:         | $s$ 9.7:         | $s$ 8.9:         | $s$ 9.5:         | $s$ 8.9:         |
|                         | $p$ : 1.00                  | $p$ : 0.99       | $p$ : 0.92      | $p$ : 0.83       | $p$ : 0.96       | $p$ : 0.95       | $p$ : 1.00       | $p$ : 0.98       |
| <b>2000</b>             | $\bar{x}$ : 3.2             | $\bar{x}$ : 3.4  | $\bar{x}$ : 4.6 | $\bar{x}$ : 7.1  | $\bar{x}$ : 10.9 | $\bar{x}$ : 15.4 | $\bar{x}$ : 16.1 | $\bar{x}$ : 26.5 |
|                         | $s$ 0.0:                    | $s$ 1.1:         | $s$ 3.2:        | $s$ 6.9:         | $s$ 8.9:         | $s$ 10.9:        | $s$ 9.3:         | $s$ 10.7:        |
|                         | $p$ : 1.00                  | $p$ : 1.00       | $p$ : 0.98      | $p$ : 0.96       | $p$ : 0.95       | $p$ : 0.95       | $p$ : 1.00       | $p$ : 0.98       |
| <b>3000</b>             | $\bar{x}$ : 1.1             | $\bar{x}$ : 1.9  | $\bar{x}$ : 3.1 | $\bar{x}$ : 5.7  | $\bar{x}$ : 8.9  | $\bar{x}$ : 14.5 | $\bar{x}$ : 19.1 | $\bar{x}$ : 30.8 |
|                         | $s$ 0.0:                    | $s$ 0.7:         | $s$ 1.2:        | $s$ 3.9:         | $s$ 6.6:         | $s$ 9.6:         | $s$ 10.0:        | $s$ 10.6:        |
|                         | $p$ : 1.00                  | $p$ : 1.00       | $p$ : 1.00      | $p$ : 0.99       | $p$ : 0.99       | $p$ : 1.00       | $p$ : 0.99       | $p$ : 0.89       |
| <b>4000</b>             | $\bar{x}$ : 0.1             | $\bar{x}$ : 1.4  | $\bar{x}$ : 3.1 | $\bar{x}$ : 6.1  | $\bar{x}$ : 12.0 | $\bar{x}$ : 19.2 | $\bar{x}$ : 23.8 | $\bar{x}$ : 32.5 |
|                         | $s$ 0.0:                    | $s$ 0.6:         | $s$ 1.5:        | $s$ 5.0:         | $s$ 9.1:         | $s$ 11.8:        | $s$ 11.1:        | $s$ 11.2:        |
|                         | $p$ : 1.00                  | $p$ : 1.00       | $p$ : 1.00      | $p$ : 1.00       | $p$ : 1.00       | $p$ : 0.97       | $p$ : 0.99       | $p$ : 0.88       |

Table 1

Results per  $b$ -value for different SNR, using Q-ball, Södermans model, with  $N_{grad}=97$ , angle= $60^\circ$  and  $\ell=6$ .  $\bar{x}$  is the mean angular error,  $s$  is the standard deviation of the angular error and  $p$  is the fraction of samples for which we could retrieve two fiber populations.

| $b$ -value ( $s/mm^2$ ) | Signal to Noise Ratio (SNR)                |                                            |                                             |                                             |                                             |                                             |                                             |                                             |
|-------------------------|--------------------------------------------|--------------------------------------------|---------------------------------------------|---------------------------------------------|---------------------------------------------|---------------------------------------------|---------------------------------------------|---------------------------------------------|
|                         | $\infty$                                   | 50.0                                       | 25.0                                        | 16.7                                        | 12.5                                        | 10.0                                        | 8.3                                         | 5.0                                         |
| <b>1000</b>             | $\bar{x}$ : 60.0<br>$s$ 0.0:<br>$p$ : 0.00 | $\bar{x}$ : 12.2<br>$s$ 5.5:<br>$p$ : 0.16 | $\bar{x}$ : 16.2<br>$s$ 10.4:<br>$p$ : 0.55 | $\bar{x}$ : 16.2<br>$s$ 11.3:<br>$p$ : 0.75 | $\bar{x}$ : 19.6<br>$s$ 10.9:<br>$p$ : 0.85 | $\bar{x}$ : 18.9<br>$s$ 10.0:<br>$p$ : 0.94 | $\bar{x}$ : 19.0<br>$s$ 9.7:<br>$p$ : 0.96  | $\bar{x}$ : 25.9<br>$s$ 10.3:<br>$p$ : 0.95 |
| <b>1500</b>             | $\bar{x}$ : 6.2<br>$s$ 0.0:<br>$p$ : 1.00  | $\bar{x}$ : 6.5<br>$s$ 1.7:<br>$p$ : 0.97  | $\bar{x}$ : 8.2<br>$s$ 6.6:<br>$p$ : 0.93   | $\bar{x}$ : 10.6<br>$s$ 9.4:<br>$p$ : 0.88  | $\bar{x}$ : 13.8<br>$s$ 10.9:<br>$p$ : 0.95 | $\bar{x}$ : 15.1<br>$s$ 10.1:<br>$p$ : 0.98 | $\bar{x}$ : 17.3<br>$s$ 10.5:<br>$p$ : 0.98 | $\bar{x}$ : 25.6<br>$s$ 9.9:<br>$p$ : 1.00  |
| <b>2000</b>             | $\bar{x}$ : 3.2<br>$s$ 0.0:<br>$p$ : 1.00  | $\bar{x}$ : 3.5<br>$s$ 1.1:<br>$p$ : 1.00  | $\bar{x}$ : 4.8<br>$s$ 4.0:<br>$p$ : 0.99   | $\bar{x}$ : 9.6<br>$s$ 9.1:<br>$p$ : 0.98   | $\bar{x}$ : 13.4<br>$s$ 11.0:<br>$p$ : 1.00 | $\bar{x}$ : 14.9<br>$s$ 9.9:<br>$p$ : 0.99  | $\bar{x}$ : 16.8<br>$s$ 10.4:<br>$p$ : 1.00 | $\bar{x}$ : 27.0<br>$s$ 10.4:<br>$p$ : 1.00 |
| <b>3000</b>             | $\bar{x}$ : 0.6<br>$s$ 0.0:<br>$p$ : 1.00  | $\bar{x}$ : 1.8<br>$s$ 0.6:<br>$p$ : 1.00  | $\bar{x}$ : 3.3<br>$s$ 1.5:<br>$p$ : 1.00   | $\bar{x}$ : 5.4<br>$s$ 4.1:<br>$p$ : 1.00   | $\bar{x}$ : 9.6<br>$s$ 8.3:<br>$p$ : 0.99   | $\bar{x}$ : 12.3<br>$s$ 8.6:<br>$p$ : 1.00  | $\bar{x}$ : 20.1<br>$s$ 11.8:<br>$p$ : 0.99 | $\bar{x}$ : 30.7<br>$s$ 11.6:<br>$p$ : 0.95 |
| <b>4000</b>             | $\bar{x}$ : 0.1<br>$s$ 0.0:<br>$p$ : 1.00  | $\bar{x}$ : 1.6<br>$s$ 0.6:<br>$p$ : 1.00  | $\bar{x}$ : 3.2<br>$s$ 1.2:<br>$p$ : 1.00   | $\bar{x}$ : 7.0<br>$s$ 6.2:<br>$p$ : 1.00   | $\bar{x}$ : 12.4<br>$s$ 9.5:<br>$p$ : 0.99  | $\bar{x}$ : 18.3<br>$s$ 11.9:<br>$p$ : 1.00 | $\bar{x}$ : 23.0<br>$s$ 11.6:<br>$p$ : 0.99 | $\bar{x}$ : 33.2<br>$s$ 9.1:<br>$p$ : 0.93  |

Table 2

Results per  $b$ -value for different SNR, using analytical DOT ODF, Södermans model, with  $N_{grad}=97$ , angle= $60^\circ$  and  $\ell=6$ .  $\bar{x}$  is the mean angular error,  $s$  is the standard deviation of the angular error and  $p$  is the fraction of samples for which we could retrieve two fiber populations.

| $b$ -value ( $s/mm^2$ ) | Signal to Noise Ratio (SNR)               |                                           |                                           |                                            |                                             |                                             |                                             |                                             |
|-------------------------|-------------------------------------------|-------------------------------------------|-------------------------------------------|--------------------------------------------|---------------------------------------------|---------------------------------------------|---------------------------------------------|---------------------------------------------|
|                         | $\infty$                                  | 50.0                                      | 25.0                                      | 16.7                                       | 12.5                                        | 10.0                                        | 8.3                                         | 5.0                                         |
| <b>1000</b>             | $\bar{x}$ : 1.1<br>$s$ 0.0:<br>$p$ : 1.00 | $\bar{x}$ : 2.9<br>$s$ 1.4:<br>$p$ : 1.00 | $\bar{x}$ : 6.3<br>$s$ 5.2:<br>$p$ : 0.92 | $\bar{x}$ : 11.2<br>$s$ 9.1:<br>$p$ : 0.90 | $\bar{x}$ : 19.2<br>$s$ 12.1:<br>$p$ : 0.87 | $\bar{x}$ : 24.6<br>$s$ 12.6:<br>$p$ : 0.87 | $\bar{x}$ : 28.4<br>$s$ 10.7:<br>$p$ : 0.84 | $\bar{x}$ : 34.2<br>$s$ 9.3:<br>$p$ : 0.68  |
| <b>1500</b>             | $\bar{x}$ : 0.6<br>$s$ 0.0:<br>$p$ : 1.00 | $\bar{x}$ : 1.9<br>$s$ 0.8:<br>$p$ : 1.00 | $\bar{x}$ : 3.4<br>$s$ 1.4:<br>$p$ : 0.98 | $\bar{x}$ : 5.7<br>$s$ 3.6:<br>$p$ : 0.95  | $\bar{x}$ : 12.5<br>$s$ 10.2:<br>$p$ : 0.88 | $\bar{x}$ : 20.0<br>$s$ 12.1:<br>$p$ : 0.91 | $\bar{x}$ : 24.2<br>$s$ 11.8:<br>$p$ : 0.90 | $\bar{x}$ : 32.0<br>$s$ 9.2:<br>$p$ : 0.82  |
| <b>2000</b>             | $\bar{x}$ : 0.6<br>$s$ 0.0:<br>$p$ : 1.00 | $\bar{x}$ : 1.5<br>$s$ 0.6:<br>$p$ : 1.00 | $\bar{x}$ : 3.0<br>$s$ 1.2:<br>$p$ : 1.00 | $\bar{x}$ : 5.3<br>$s$ 3.3:<br>$p$ : 0.98  | $\bar{x}$ : 10.4<br>$s$ 9.3:<br>$p$ : 0.88  | $\bar{x}$ : 19.2<br>$s$ 13.2:<br>$p$ : 0.87 | $\bar{x}$ : 26.6<br>$s$ 13.3:<br>$p$ : 0.95 | $\bar{x}$ : 32.5<br>$s$ 9.7:<br>$p$ : 0.74  |
| <b>3000</b>             | $\bar{x}$ : 1.0<br>$s$ 0.0:<br>$p$ : 1.00 | $\bar{x}$ : 1.6<br>$s$ 0.6:<br>$p$ : 1.00 | $\bar{x}$ : 2.8<br>$s$ 1.0:<br>$p$ : 1.00 | $\bar{x}$ : 6.4<br>$s$ 6.0:<br>$p$ : 0.97  | $\bar{x}$ : 13.8<br>$s$ 11.2:<br>$p$ : 0.94 | $\bar{x}$ : 21.5<br>$s$ 13.5:<br>$p$ : 0.85 | $\bar{x}$ : 28.6<br>$s$ 11.1:<br>$p$ : 0.83 | $\bar{x}$ : 35.9<br>$s$ 9.7:<br>$p$ : 0.67  |
| <b>4000</b>             | $\bar{x}$ : 0.1<br>$s$ 0.0:<br>$p$ : 1.00 | $\bar{x}$ : 1.7<br>$s$ 0.7:<br>$p$ : 1.00 | $\bar{x}$ : 3.4<br>$s$ 1.4:<br>$p$ : 1.00 | $\bar{x}$ : 8.4<br>$s$ 9.3:<br>$p$ : 0.95  | $\bar{x}$ : 22.5<br>$s$ 13.1:<br>$p$ : 0.98 | $\bar{x}$ : 28.9<br>$s$ 13.1:<br>$p$ : 0.83 | $\bar{x}$ : 31.0<br>$s$ 10.9:<br>$p$ : 0.80 | $\bar{x}$ : 33.4<br>$s$ 10.3:<br>$p$ : 0.59 |

Table 3

Results per  $b$ -value for different SNR, using DOT, Södermans model, with  $N_{grad}=97$ , angle= $60^\circ$  and  $\ell=6$ .  $\bar{x}$  is the mean angular error,  $s$  is the standard deviation of the angular error and  $p$  is the fraction of samples for which we could retrieve two fiber populations.
